# Supplementary material
Source: publisher figshare collection journal article supplement (https://rs.figshare.com/ndownloader/files/14703761)
Supplement: Supplementary file 1 [file 14703761]

| **List 1** |  |  |  | **List 2** |  |  |
| --- | --- | --- | --- | --- | --- | --- |
| **Word** | **Novel word** | **Type** |  | **Word** | **Novel word** | **Type** |
| torso | tarso | Natural |  | chalk | coalk | Natural |
| lettuce | lestuce | Natural |  | sperm | scerm | Natural |
| PIGEON | PIGERN | Natural |  | hamster | hemster | Natural |
| WALNUT | WALNOT | Natural |  | GALAXY | GANAXY | Natural |
| GARLIC | GARNIC | Natural |  | MEADOW | MEAROW | Natural |
| POTATO | PORATO | Natural |  | KIDNEY | KIDLEY | Natural |
| embryo | elbryo | Natural |  | BAMBOO | BALBOO | Natural |
| lagoon | lafoon | Natural |  | fungus | fulgus | Natural |
| artery | artely | Natural |  | helium | hesium | Natural |
| raisin | raibin | Natural |  | turnip | turwip | Natural |
| album | alfum | Artefact |  | robot | rogot | Artefact |
| ladle | lamle | Artefact |  | attic | atric | Artefact |
| vodka | vopka | Artefact |  | HELMET | HOLMET | Artefact |
| ANCHOR | AMCHOR | Artefact |  | COFFIN | COLFIN | Artefact |
| TARMAC | TALMAC | Artefact |  | PARCEL | PARGEL | Artefact |
| CRADLE | CRAGLE | Artefact |  | VIOLIN | VIODIN | Artefact |
| SLEEVE | SLEERE | Artefact |  | TATTOO | TARTOO | Artefact |
| velvet | velcet | Artefact |  | luggage | lutgage | Artefact |
| bakery | bamery | Artefact |  | gadget | gaddet | Artefact |
| canteen | calteen | Artefact |  | picnic | picsic | Artefact |
|  |  |  |  |
| **List 3** |  |  |  | **List 4** |  |  |
| **Word** | **Novel word** | **Type** |  | **Word** | **Novel word** | **Type** |
| ozone | odone | Natural |  | lemon | leton | Natural |
| ulcer | ulper | Natural |  | tornado | ternado | Natural |
| SPIDER | SPIMER | Natural |  | BANANA | BANARA | Natural |
| BEETLE | BRETLE | Natural |  | CELERY | CEDERY | Natural |
| TENDON | TANDON | Natural |  | OYSTER | OGSTER | Natural |
| TOMATO | TORATO | Natural |  | FOSSIL | FOSTIL | Natural |
| mussel | mulsel | Natural |  | mammal | mamkal | Natural |
| pollen | polfen | Natural |  | almond | alsond | Natural |
| armpit | arfpit | Natural |  | peanut | peanit | Natural |
| baboon | batoon | Natural |  | EYELID | EYENID | NATURAL |
| siren | sisen | Artefact |  | foyer | fojer | Artefact |
| chimney | chimtey | Artefact |  | abbey | abdey | Artefact |
| razor | rafor | Artefact |  | NAPKIN | NASKIN | Artefact |
| TEAPOT | TEAWOT | Artefact |  | FABRIC | FABLIC | Artefact |
| NEEDLE | NERDLE | Artefact |  | MOSAIC | MODAIC | Artefact |
| PILLAR | PILTAR | Artefact |  | PENCIL | PUNCIL | Artefact |
| GUITAR | GUITUR | Artefact |  | caravan | cagavan | Artefact |
| laundry | launtry | Artefact |  | ghetto | ghetlo | Artefact |
| pulpit | pulrit | Artefact |  | saucer | saurer | Artefact |
| liquor | lituor | Artefact |  | APRON | ALRON | ARTEFACT |
